# Supplementary material
Source: publisher figshare collection journal article supplement (https://acs.figshare.com/ndownloader/files/3776251)
Supplement: Supplementary file 1 [file 3776251]

## Supporting information

# Designing hydrophobically modified polysaccharide derivatives for highly efficient enzyme immobilization

*Tamilselvan Mohan,<sup>†,\*</sup> Raffael Rathner,<sup>†</sup> David Reishofer,<sup>‡</sup> Martin Koller,<sup>†,§</sup> Thomas Elschner,<sup>§</sup> Stefan Spirk,<sup>‡</sup> Thomas Heinze,<sup>§</sup> Karin Stana-Kleinschek,<sup>β</sup> Rupert Kargl,<sup>β</sup>*

<sup>†</sup>Institute for Chemistry, University of Graz, Heinrichstrasse 28, 8010 Graz, Austria.

<sup>‡</sup>Institute for Chemistry and Technology of Materials, Graz University of Technology, Stremayrgasse 9, 8010 Graz, Austria.

<sup>§</sup>Center of Excellence for Polysaccharide Research, Friedrich Schiller University Jena, Humboldtstraße 10, 07743 Jena, Germany

<sup>β</sup>Institute for Engineering Materials and Design, University of Maribor, Smetanova 17, 2000 Maribor, Slovenia.

<sup>§</sup>ARENA – Association for Resource-Efficient and Sustainable Technologies, Inffeldgasse 21b, 8010 Graz, Austria

To whome correspondence should be addressed:

\*E-Mail: [tamilselvan.mohan@uni-graz.at](mailto:tamilselvan.mohan@uni-graz.at), Tel: +43 316 380 5413

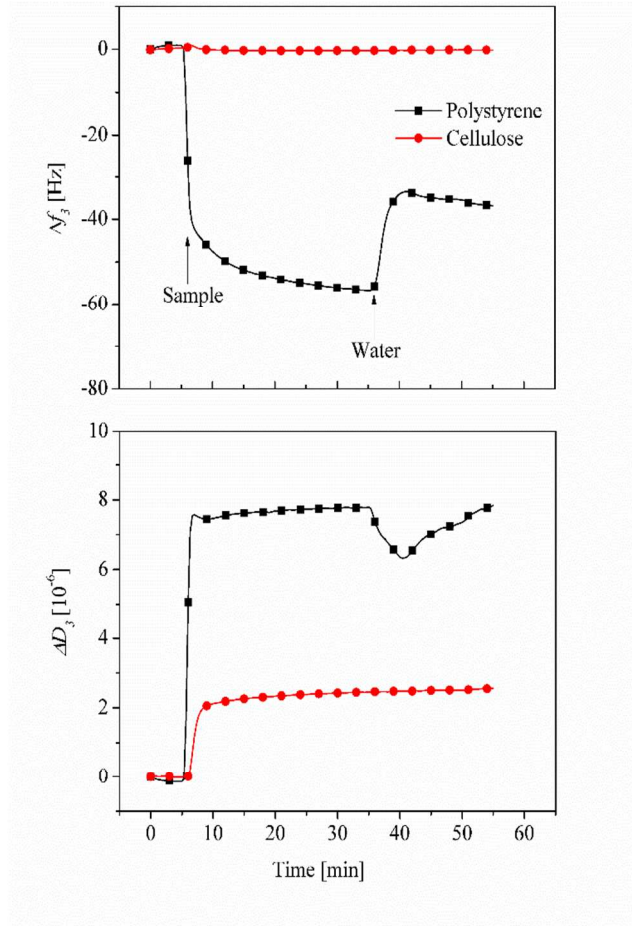

**Figure S1:** QCM-D measurements showing the Interaction of BCMC with cellulose (red line) and polystyrene (black line).

### Calculation of QCM-D wet mass of HRP using Sauerbrey equation

The wet mass of the immobilized HRP enzyme can be calculated using the Sauerbrey equation:

$$\Delta m = C \frac{\Delta f_n}{n} \quad (1)$$

where  $\Delta f_n$  is the observed frequency shift,  $C$  is the Sauerbrey constant ( $-17.7 \text{ ng Hz}^{-1} \text{ cm}^{-2}$  for a 5 MHz crystal),  $n$  is the overtone number ( $n = 1, 3, 5$ , etc.), and  $\Delta m$  is the change in mass of the crystal due to the adsorbed layer.

### **Determination of ABTS activity of immobilized HRP**

For method I, the BCMC coated and pure PS films ( $1 \times 1 \text{ cm}^2$ ) were placed in 12 well plates. 1 mL of HRP ( $1 \text{ mg mL}^{-1}$ , dissolved in water) was added into the well and incubated for 180 minutes. Afterwards, the HRP solution was exchanged for 1 mL of water for 20 minutes. The films were taken out, rinsed with water and blow dried with nitrogen gas. In method II, 1 mL of an aqueous EDC·HCl, and HRP (both  $1 \text{ mg mL}^{-1}$ , dissolved in water) were added into the wells and incubated for 180 minutes. Following this, solutions were exchanged for 1 mL of water and incubated for 20 minutes. After this step, the films were removed from the liquid, rinsed with water, and blow dried with nitrogen gas. In method III, 1 mL of EDC·HCl ( $1 \text{ mg mL}^{-1}$ , dissolved in water) was added into the well and incubated for 20 minutes. Following subsequent washing, the EDC·HCl solution was exchanged with 1 mL of HRP solution and incubated for 180 minutes. The HRP solution was exchanged for 1 mL of Milli-Q water and incubated for 20 minutes. Finally, the films were removed from the liquid, rinsed with water and blow dried with nitrogen gas.
